# Supplementary material
Source: PubMed Central journal article supplement (PMC9129887)

## Supplemental Figure 1. Study Selection Process (PRISMA Flow Diagram)

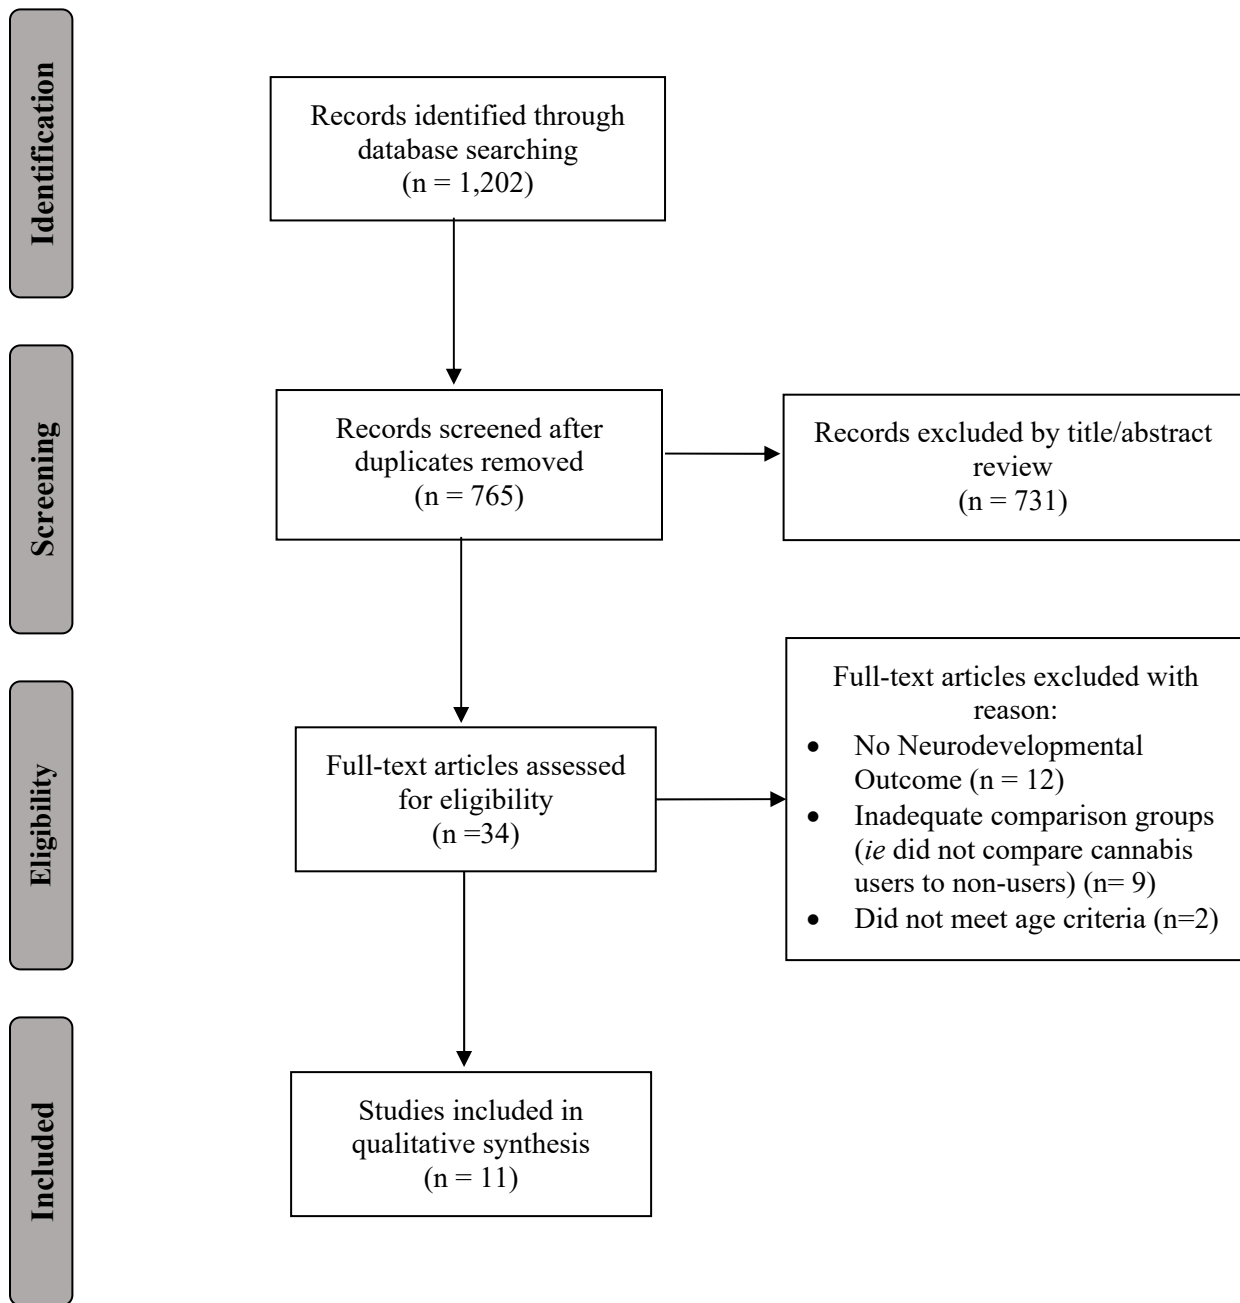

Supplement: NIHMS1806787-supplement-Supplemental_Figure_1_.pdf [file NIHMS1806787-supplement-Supplemental_Figure_1_.pdf]
